# Supplementary material
Source: HighWire-hosted journal article supplement (https://cmaj.ca/highwire/filestream/57574/field_highwire_adjunct_files/0/safety-halperin-tt3-web.pdf)
Supplement: safety-halperin-tt3-web.pdf [file safety-halperin-tt3-web.pdf]

**Table 3: Geometric mean antibody titres before and 7 and 21 days after vaccination with trivalent influenza vaccine in subjects treated with placebo or *Chlorella pyrenoidosa* extract (CPE)\***

| Influenza strain and treatment | Geometric mean antibody titre (and 95% CI), reciprocal dilution |                   |                  |
|--------------------------------|-----------------------------------------------------------------|-------------------|------------------|
|                                | Day of vaccination                                              | 7 days            | 21 days          |
| <b>Age 50–55 yr</b>            |                                                                 |                   |                  |
| <i>A/New Caledonia</i>         |                                                                 |                   |                  |
| Placebo                        | 23.0 (13.7–38.6)                                                | 29.0 (16.9–49.7)  | 43.2 (27.1–69.0) |
| 200 mg CPE                     | 23.0 (12.1–43.8)                                                | 47.8 (32.3–70.9)  | 84.3 (55.3–129)  |
| 400 mg CPE                     | 33.4 (17.1–65.1)                                                | 57.6 (29.5–112)   | 84.4 (46.7–152)† |
| <i>A/Panama</i>                |                                                                 |                   |                  |
| Placebo                        | 28.6 (15.1–54.1)                                                | 39.9 (20.5–77.8)  | 65.9 (37.7–115)  |
| 200 mg CPE                     | 16.0 (9.17–28.0)                                                | 26.6 (14.5–48.6)  | 57.4 (40.5–81.3) |
| 400 mg CPE                     | 33.2 (15.3–72.3)                                                | 64.5 (33.5–124)   | 87.9 (45.2–171)  |
| <i>B/Yamanashi</i>             |                                                                 |                   |                  |
| Placebo                        | 11.4 (7.90–16.5)                                                | 14.4 (9.28–22.2)  | 29.6 (16.3–44.6) |
| 200 mg CPE                     | 12.7 (7.25–22.1)                                                | 15.9 (8.82–28.8)  | 25.3 (14.3–44.8) |
| 400 mg CPE                     | 15.7 (8.90–27.9)                                                | 30.1 (17.4–52.1)‡ | 39.5 (23.5–66.5) |
| <b>Age &gt; 55 yr</b>          |                                                                 |                   |                  |
| <i>A/New Caledonia</i>         |                                                                 |                   |                  |
| Placebo                        | 30.6 (16.6–56.5)                                                | 51.8 (28.3–94.8)  | 74.0 (39.9–137)  |
| 200 mg CPE                     | 26.8 (16.5–43.5)                                                | 42.1 (26.6–66.8)  | 70.1 (43.2–114)  |
| 400 mg CPE                     | 21.3 (12.3–36.7)                                                | 36.7 (21.4–63.0)  | 46.7 (25.6–85.4) |
| <i>A/Panama</i>                |                                                                 |                   |                  |
| Placebo                        | 35.1 (19.6–62.7)                                                | 61.6 (38.2–99.3)  | 99.4 (65.0–152)  |
| 200 mg CPE                     | 37.1 (25.3–54.4)                                                | 56.2 (39.6–79.6)  | 84.7 (61.7–116)  |
| 400 mg CPE                     | 53.4 (31.1–91.6)                                                | 74.5 (44.4–125)   | 98.4 (57.1–170)  |
| <i>B/Yamanashi</i>             |                                                                 |                   |                  |
| Placebo                        | 13.1 (9.06–18.9)                                                | 18.8 (12.3–28.9)  | 25.8 (16.5–40.3) |
| 200 mg CPE                     | 9.43 (6.79–13.1)                                                | 13.2 (9.51–18.4)  | 20.0 (13.8–28.9) |
| 400 mg CPE                     | 11.2 (7.30–17.1)                                                | 16.3 (10.7–25.0)  | 19.2 (12.5–29.5) |

Note: CI = confidence interval.

\*The point data in this table are presented graphically in Fig. 2.

†Significantly different from before vaccination ( $p = 0.047$ ).

‡Significantly different from before vaccination ( $p = 0.034$ ).
